# Supplementary material for: Vav1 is Essential for HIF-1α Activation via a Lysosomal VEGFR1-Mediated Degradation Mechanism in Endothelial Cells
Source: PubMed Central journal article supplement (PMC7352305; doi:10.3390/cancers12061374), 2020-05-27
Supplement: cancers-12-01374-s001.pdf [file cancers-12-01374-s001.pdf]

# Vav1 is Essential for HIF-1 $\alpha$ Activation via a Lysosomal VEGFR1-Mediated Degradation Mechanism in Endothelial Cells

Jaewoo Hong <sup>†,\*</sup>, Yongfen Min <sup>†</sup>, Todd Wuest and P. Charles Lin <sup>\*</sup>

Center for Cancer Research, National Cancer Institute, National Institutes of Health, Frederick, MD 21704, USA; yongfen.min@nih.gov (Y.M.); todd.wuest1@gmail.com (T.W.)

<sup>†</sup> These authors contributed equally.

<sup>\*</sup> Correspondence: jaewoo.hong@nih.gov (J.H.); p.lin@nih.gov (P.C.L.)

## Supplementary

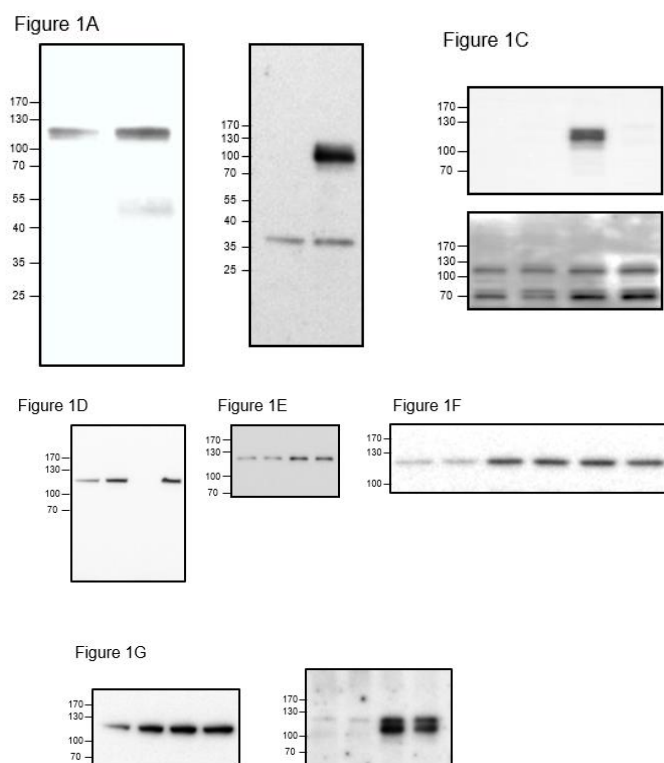

**Figure S1.** Whole blot images from Figure 1.

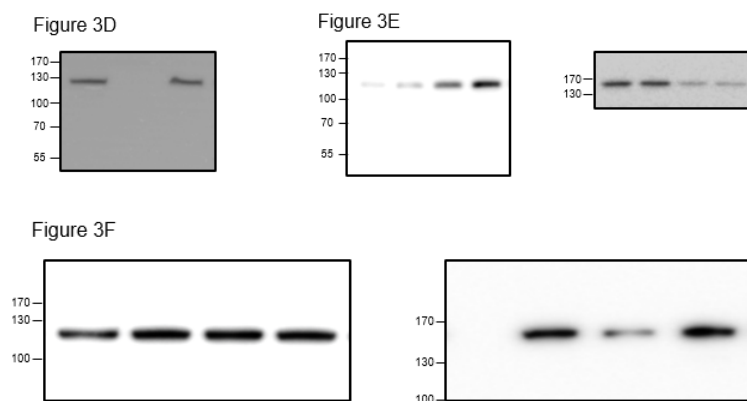

**Figure S2.** Whole blot images from Figure 3.

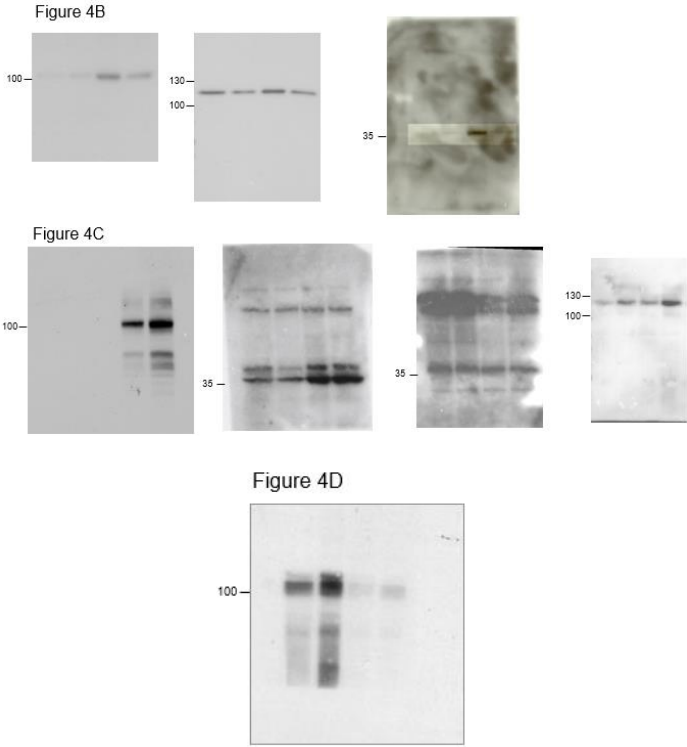

Figure S3. Whole blot images from Figure 4.

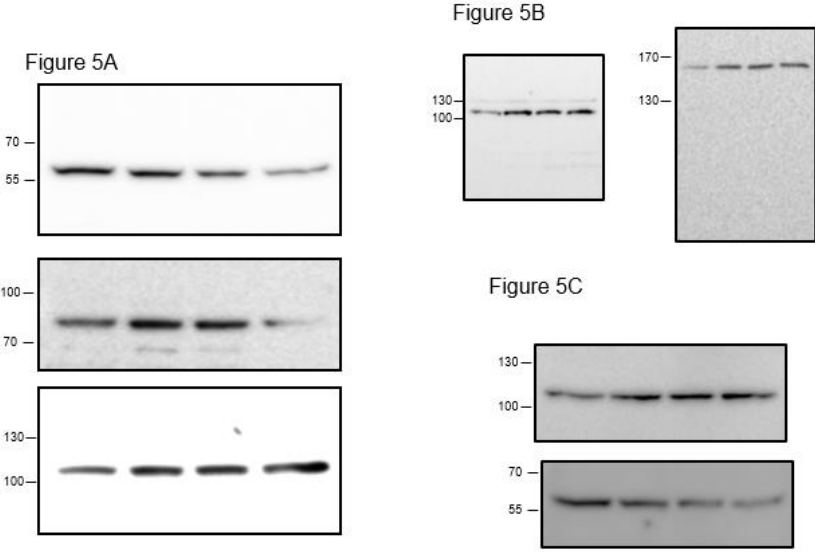

Figure S4. Whole blot images from Figure 5.
